# Supplementary material
Source: ML conference proceedings conference paper supplement (https://openreview.net/forum?id=7mVZy4mI1J)
Supplement: supplementary_material [file main_fig.pdf › PRM_reward_hacking/PRMBench/docs/assets/main_fig.pdf]

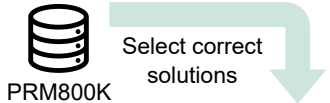

(a). Original Data Instances

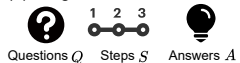

(b). Data Construction & Annotation

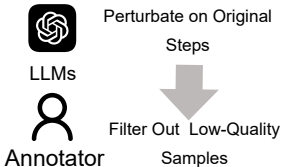

(c). Evaluation Data Instances

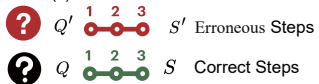

**Data Construction Procedure**

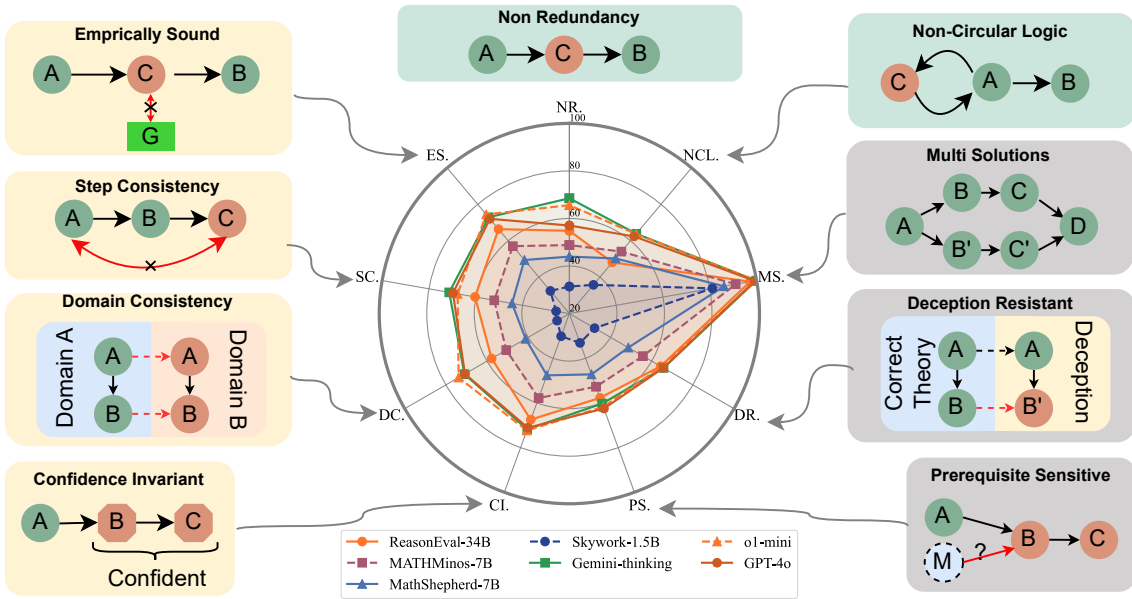

**PRMBench: A Comprehensive Evaluation of PRMs**
