# Supplementary material
Source: ML conference proceedings conference paper supplement (https://openreview.net/forum?id=7mVZy4mI1J)

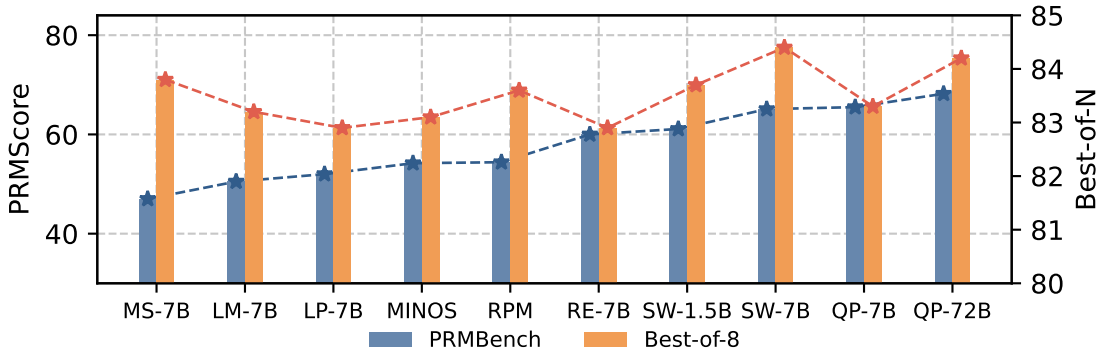

Supplement: supplementary_material [file correlation.pdf › PRM_reward_hacking/PRMBench/mr_visualize/eval_res_view/draw_figure/res/correlation.pdf]

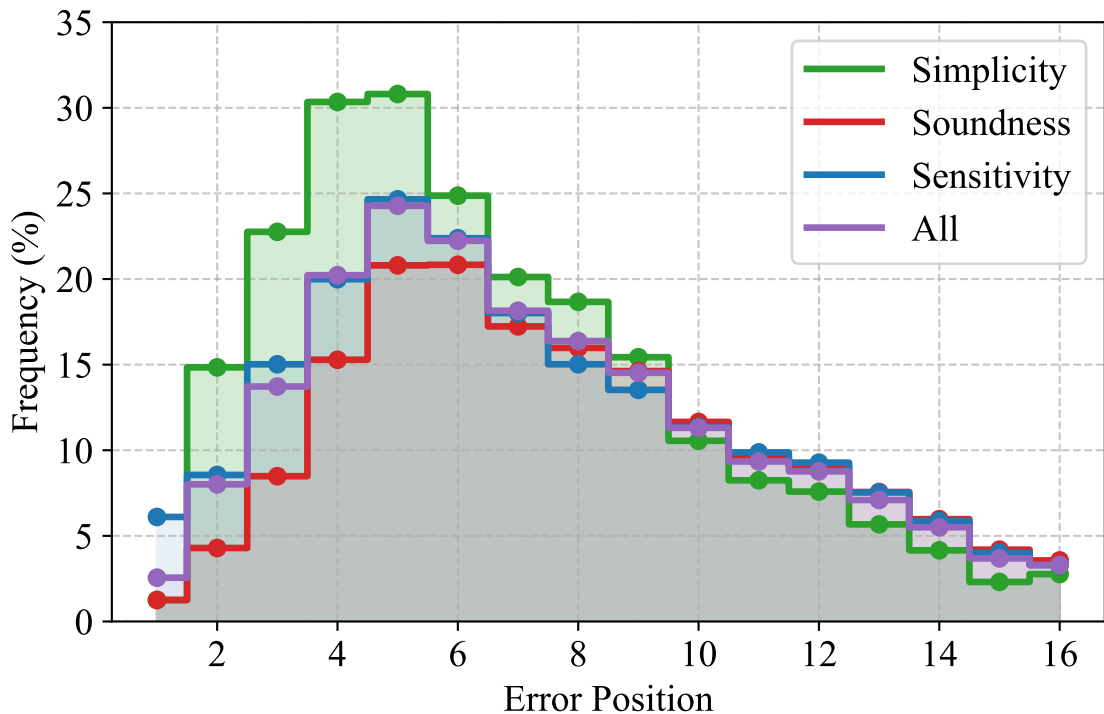

Supplement: supplementary_material [file error_position_distribution.pdf › PRM_reward_hacking/PRMBench/mr_visualize/eval_res_view/draw_figure/res/error_position_distribution.pdf]

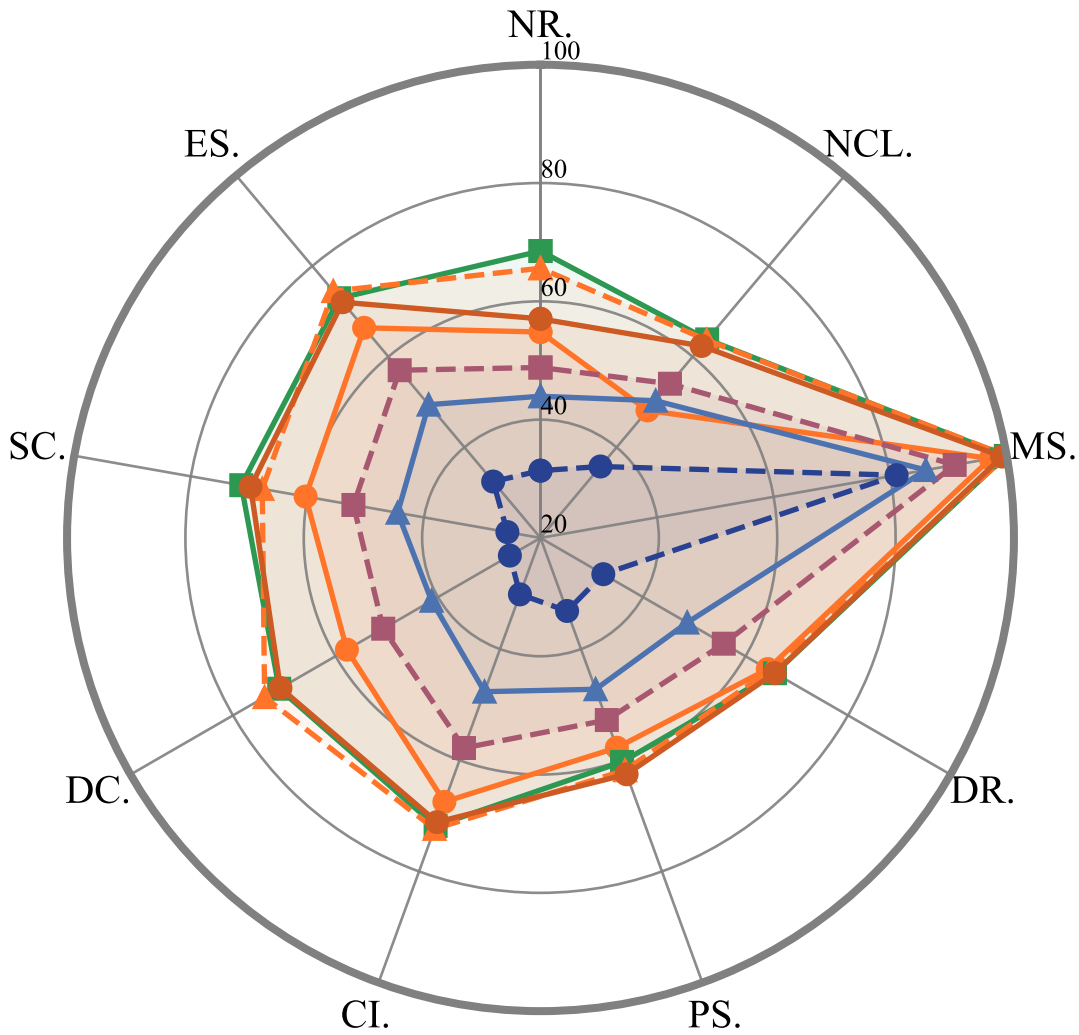

ReasonEval-34B

Skywork-1.5B

o1-mini

MATHMinos-7B

Gemini-thinking

GPT-4o

MathShepherd-7B

Supplement: supplementary_material [file llava_radar.pdf › PRM_reward_hacking/PRMBench/mr_visualize/eval_res_view/draw_figure/res/llava_radar.pdf]

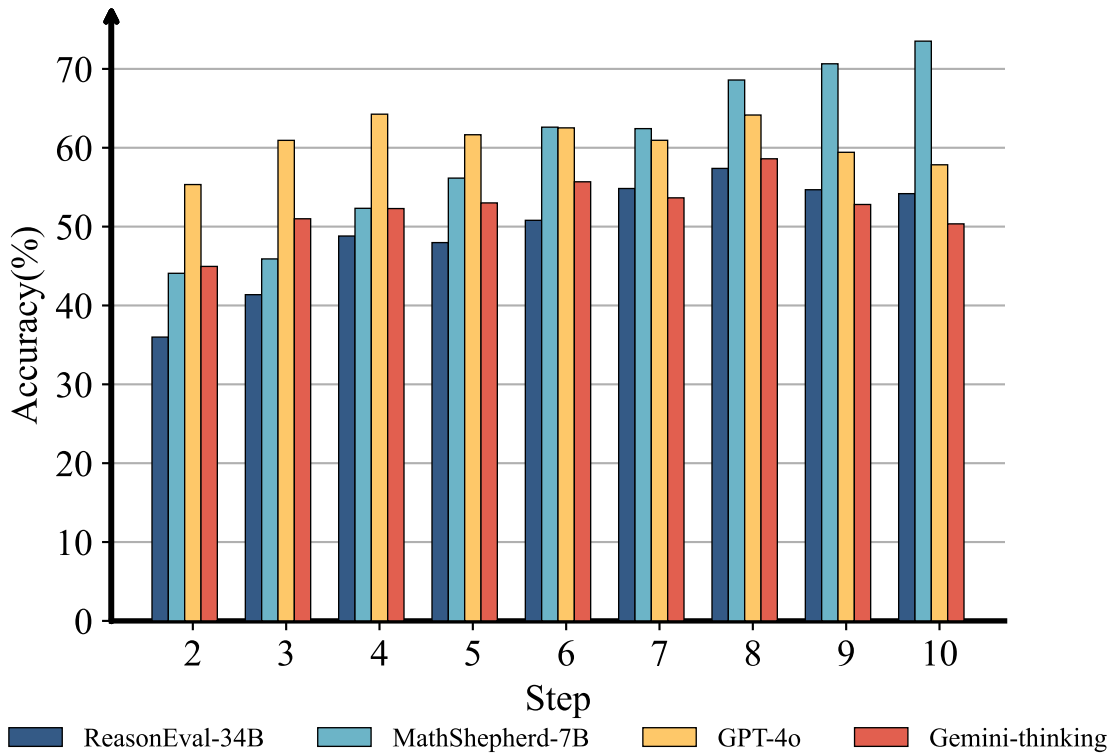

Supplement: supplementary_material [file step_acc.pdf › PRM_reward_hacking/PRMBench/mr_visualize/eval_res_view/draw_figure/res/step_acc.pdf]
